# Supplementary material for: Mass spectrometric analysis of the in vitro secretome from equine bone marrow-derived mesenchymal stromal cells to assess the effect of chondrogenic differentiation on response to interleukin-1β treatment
Source: Stem Cell Res Ther. 2020 May 20;11:187. doi: 10.1186/s13287-020-01706-7 (PMC7238576; doi:10.1186/s13287-020-01706-7)
Supplement: Supplementary file 2 — Additional file 2: Supplementary 3. Table with data used for the heatmap. [file 13287_2020_1706_MOESM2_ESM.xlsx]

## Sheet: EMCMIL_Function
Accession	Protein names	Gene_names	EM_EMIL_48h	CM_CMIL_48h	EM_EMIL_10d	CM_CMIL_10d
F7BV41	ADAM metallopeptidase domain 17	ADAM17	NA	NA	EM	NA
F7D9Z8	ADAM metallopeptidase domain 9	ADAM9	NA	NA	NA	CM
F6TW13	ADAM metallopeptidase with thrombospondin type 1 motif 12	ADAMTS12	0.818431151	3049163416	1607193677	NA
F6YRD3	ADAM metallopeptidase with thrombospondin type 1 motif 4	ADAMTS4	EMIL	NA	NA	NA
F7A971	Fibrinogen C-terminal domain-containing protein	ANGPTL4	8609797343	NA	1049088227	1046845477
Q8HZM6	Annexin A1 (Annexin I) (Annexin-1) (Calpactin II) (Calpactin-2) (Lipocortin I)	ANXA1 ANX1	1140427448	151034384	0.259534306	1145654547
F6XKR3	Amyloid beta precursor protein	APP	1135393314	0.691287712	EMIL	0.795883195
F7E284	Asporin	ASPN	NA	CM	NA	0.560774494
P30441	Beta-2-microglobulin	B2M	EMIL	CM	1181036138	CMIL
F6UV15	C1q and TNF related 6	C1QTNF6	NA	NA	NA	CM
F6Z5L1	Complement C1r	C1R	2733484311	CMIL	2530460151	CMIL
F7BQD6	Complement C1s	C1S	5762478801	1385770317	1788576079	2449572189
F6T4F6	Collagen and calcium binding EGF domains 1	CCBE1	EM	NA	EMIL	NA
F7DE18	Coiled-coil domain containing 80	CCDC80	1838872522	1065145482	5411741584	0.70330183
F6YD73	C-C motif chemokine	CCL7	EMIL	CMIL	EMIL	CMIL
F6X0K3	Cellular communication network factor 2	CCN2 CTGF	2790201363	0.295708171	2557994818	0.729872452
F6PTV7	CD44 antigen	CD44	EMIL	1659481618	EMIL	1762052389
F7CYX6	Hexosyltransferase (EC 2.4.1.-)	CHPF	0.595615615	1161287572	EMIL	NA
F7D1L7	Hexosyltransferase (EC 2.4.1.-)	CHSY3	NA	1019955526	NA	CMIL
F6VAW6	Collagen type XI alpha 1 chain	COL11A1	0.241538635	0.780402378	0.41640793	0.540681996
F6XHX6	Collagen type XVIII alpha 1 chain	COL18A1	EMIL	NA	EM	CMIL
F6UHM7	Collagen type VIII alpha 1 chain	COL8A1	EM	NA	EM	0.228164467
F6U3D3	Cartilage oligomeric matrix protein	COMP	NA	0.162928439	NA	0.327534128
F7DGX8	Cartilage acidic protein 1	CRTAC1	NA	NA	EMIL	NA
F6W2X2	Cartilage associated protein	CRTAP	0.697671206	0.956536105	4193497987	0.760148892
F6SXC4	Colony stimulating factor 1	CSF1	1148972538	3053708873	1124553021	1898723421
F6T201	Chondroitin sulfate proteoglycan 4	CSPG4	NA	CM	EM	NA
F6QJ78	Carboxypeptidase (EC 3.4.16.-)	CTSA	1726977812	1220830373	EM	0.790809497
F6YNH6	Cathepsin B	CTSB	1213752513	1715399831	340852377	1180324066
F6VUW2	Cathepsin S	CTSS	EMIL	0.585184551	NA	CMIL
F6R8V8	C-X-C motif chemokine	CXCL1	EMIL	CMIL	EMIL	CMIL
F7CTX0	C-X-C motif chemokine ligand 16	CXCL16	EMIL	8596570775	NA	NA
F6S9Z1	C-X-C motif chemokine	CXCL6	EMIL	CMIL	EMIL	CMIL
F6U909	Multifunctional fusion protein [Includes: Interleukin-8 (IL-8) (C-X-C motif chemokine 8) (Chemokine (C-X-C motif) ligand 8); C-X-C motif chemokine]	CXCL8	EMIL	NA	NA	NA
O46542	Decorin (Bone proteoglycan II) (Dermatan sulfate proteoglycan II) (DS-PGII) (PG-S2)	DCN	32217845	1785879248	4509368765	11925312
F6T2K8	Dermatopontin	DPT	EM	0.474623328	0.287440921	1176780399
F7CGP9	Extracellular matrix protein 2	ECM2	EM	0.948803707	EMIL	0.869350613
F6T0M8	EGF containing fibulin extracellular matrix protein 1	EFEMP1	0.207272039	0.474340857	0.411814063	0.789819324
F6V4S1	Epiphycan	EPYC	NA	NA	NA	0.299847859
F6RH45	Endothelial cell specific molecule 1	ESM1	EMIL	NA	NA	NA
F6TQG8	Exostosin glycosyltransferase 1	EXT1	160146198	1374042938	3457441458	1120375268
F6UT65	Family with sequence similarity 171 member B	FAM171B ITGAV	EM	NA	EMIL	NA
F6RF99	Fibroblast activation protein alpha	FAP	NA	0.234095357	EMIL	0.295246269
F6ZQP7	Filamin binding LIM protein 1	FBLIM1	EMIL	NA	NA	NA
F6SRH3	Fibulin 5	FBLN5	0.077974113	0.489659875	0.065952158	0.486569789
F6R1Q0	Fibroblast growth factor (FGF)	FGF21	NA	NA	EMIL	3024124965
F6TLF7	Fibroblast growth factor (FGF)	FGF7	EMIL	NA	2679422488	NA
H9GZM1	Growth arrest specific 6	GAS6	NA	0.497439928	EM	0.545559176
F7CHI7	Lactoylglutathione lyase (EC 4.4.1.5) (Glyoxalase I)	GLO1	NA	NA	EM	CMIL
F7DRG2	Glypican 1	GPC1	1881342112	0.727863921	1389621862	1245124179
F6VFY0	Gremlin	GREM1	EMIL	NA	NA	CMIL
F6X1I8	Hemopexin	HPX	0.714887515	0.920835133	1040096545	CMIL
F6ZQF7	Intercellular adhesion molecule 1	ICAM1	EMIL	NA	NA	NA
F7ALY5	Insulin like growth factor binding protein 5	IGFBP5	0.443454987	0.772205482	0.204104968	CMIL
F7DEB1	Insulin like growth factor binding protein 6	IGFBP6	0.797748571	101728965	0.182180715	1004508028
F7C1S7	Interleukin 11	IL11	EMIL	NA	NA	CMIL
F7CCI7	Multifunctional fusion protein [Includes: Interleukin-1; Interleukin-1 beta]	IL1B	EMIL	CMIL	NA	NA
Q95181	Interleukin-6 (IL-6)	IL6	EMIL	CMIL	EMIL	NA
F7CFP8	Interleukin 6 signal transducer	IL6ST	0.313157491	CMIL	EM	1226174727
P55102	Inhibin beta A chain (Activin beta-A chain)	INHBA	5200436092	1658465217	1397148863	1408660533
F6ZTM9	Inhibin subunit beta E	INHBE	NA	NA	EMIL	NA
F6ZZX8	Integrin subunit alpha 4	ITGA4	0.345931759	1250987501	EMIL	1114792215
F6UR46	Integrin beta	ITGB1	0.83225445	0.921991953	8850785784	1053287409
F6TXW5	Integrin beta	ITGB5	NA	NA	EM	NA
F7BK38	Laminin subunit beta 2	LAMB2	0.193477588	1760097282	0.149742292	CMIL
Q8HZI9	Laminin subunit gamma-2 (Epiligrin subunit gamma) (Kalinin subunit gamma) (Laminin-5 subunit gamma) (Nicein subunit gamma)	LAMC2	EM	0.873762227	NA	CMIL
F6TIR2	Lipocalin 2	LCN2	1353880743	4194037931	9900493708	1912488951
F7C0Y4	Serum amyloid A protein	LOC100056936	EMIL	CMIL	NA	CMIL
F6XWM5	Haptoglobin	LOC100067869	EMIL	CMIL	9408483511	NA
F6UXM7	Lysyl oxidase like 3	LOXL3	2858815819	NA	1254251799	CM
F6ZDB7	Latent transforming growth factor beta binding protein 2	LTBP2	1049728952	0.506040268	0.295839927	197420154
F6SKT2	Lumican	LUM	2921307408	1320497174	3247073579	123280678
F6RPL1	Mannan binding lectin serine peptidase 1	MASP1	0.277241469	123660112	1424741905	0.770304992
Q9XSZ5	Interstitial collagenase (EC 3.4.24.7) (Matrix metalloproteinase-1) (MMP-1)	MMP1	EMIL	NA	EMIL	CMIL
F7C6S0	Matrix metallopeptidase 19	MMP19	0.723889213	0.961116591	EMIL	CMIL
Q28397	Stromelysin-1 (SL-1) (EC 3.4.24.17) (Matrix metalloproteinase-3) (MMP-3)	MMP3	EMIL	NA	NA	NA
F6R7B4	Matrix metallopeptidase 8	MMP8	EMIL	CMIL	EMIL	6584013369
F6PJV0	Matrix remodeling associated 5	MXRA5	1895509912	6088916325	454470418	1610649275
F6UG31	Matrix remodeling associated 8	MXRA8	0.32095547	CM	0.511169606	NA
F7AEL9	Neuron derived neurotrophic factor	NDNF	EMIL	CMIL	EMIL	1551578242
F6XH19	Nidogen 1	NID1	0.595813029	0.776199292	0.537240362	0.259089664
F6VYL1	Nidogen 2	NID2	7169935444	1346754641	9444416754	CM
F6PVJ6	Osteoglycin	OGN	EM	0.251726707	0.104489985	0.429199815
F7CPB4	Oncostatin M	OSM	EMIL	NA	NA	NA
F6UX29	Prolyl 3-hydroxylase 1	P3H1	EM	1391960943	EMIL	0.639615612
F6T0X9	Prolyl 4-hydroxylase subunit alpha 1	P4HA1	NA	0.654364867	3624703427	0.777880202
F6PQC1	Prolyl 4-hydroxylase subunit alpha 2	P4HA2	NA	CM	NA	0.823363821
F6RA82	Pappalysin 1	PAPPA	NA	0.842627787	106282914	CMIL
F6Q748	Platelet-derived growth factor receptor beta (PDGF-R-beta) (PDGFR-beta) (EC 2.7.10.1) (Beta platelet-derived growth factor receptor) (Beta-type platelet-derived growth factor receptor)	PDGFRB	0.666442771	0.843418379	1356524651	CM
F6WLV4	Platelet derived growth factor receptor like	PDGFRL	NA	1395322071	EM	1385902576
F6V2X7	Procollagen-lysine,2-oxoglutarate 5-dioxygenase 1	PLOD1	1128363105	0.782129993	4982082382	0.740897056
F7B390	Procollagen-lysine,2-oxoglutarate 5-dioxygenase 2	PLOD2	2035409208	0.591870187	1060327586	0.839167611
F7B3H1	Procollagen-lysine,2-oxoglutarate 5-dioxygenase 3	PLOD3	1126383394	0.660657214	4508365837	0.891448653
F7AGA5	Plastin 3	PLS3	0.660442737	0.888125148	0.163836237	0.599781865
F6W584	Podocan	PODN	0.707607143	0.933961112	EMIL	NA
F6RZ46	Proline and arginine rich end leucine rich repeat protein	PRELP	EM	CM	EM	0.768897386
F7CYA8	Pleiotrophin	PTN	NA	CM	NA	CM
F7C5F1	Retinoic acid receptor responder 2	RARRES2	0.593971581	0.934265533	0.072433778	1105442694
F6XL03	Stimulator of chondrogenesis 1	SCRG1	NA	0.15866335	NA	0.597791527
F7CW51	Syndecan binding protein	SDCBP	5008441811	1600299304	4853221397	0.991810271
F6T8U8	Semaphorin 3C	SEMA3C	545463301	133651455	EMIL	201709349
F7C7V8	Semaphorin 7A	SEMA7A	EMIL	CMIL	NA	NA
P05619	Leukocyte elastase inhibitor (LEI) (Serpin B1)	SERPINB1 ELANH2	NA	NA	EM	0.948550133
F6W8C8	Serpin family B member 6	SERPINB6	0.826879901	NA	EM	0.962526818
F7DDC0	Serpin family E member 1	SERPINE1	8182893285	0.872234296	2768073879	0.970793238
F7BKE1	Serpin family F member 1	SERPINF1	0.296509321	0.670313772	0.351990799	0.562742797
F6XXR7	Secreted frizzled related protein 2	SFRP2	0.272381318	1072313235	0.072015768	0.272862904
F6V822	Uncharacterized protein	SLPI	EMIL	CMIL	EMIL	1196043721
F6ZX78	SPARC related modular calcium binding 2	SMOC2	EM	NA	EM	0.307082161
P00443	Superoxide dismutase [Cu-Zn] (EC 1.15.1.1)	SOD1	0.636615601	0.713357306	0.096902861	0.866709127
F6ZEE0	Scavenger receptor cysteine rich family member with 5 domains	SSC5D	EM	CM	NA	NA
O19011	Transforming growth factor beta-1 proprotein [Cleaved into: Latency-associated peptide (LAP); Transforming growth factor beta-1 (TGF-beta-1)]	TGFB1	0.257055257	NA	NA	CM
F6YX31	Transforming growth factor beta	TGFB2	0.295106248	1198598764	0.356202584	0.99717243
F6VB94	Transforming growth factor beta induced	TGFBI	1490008522	1405416387	1746856346	3151333574
F7D8C2	Transforming growth factor beta receptor 3	TGFBR3	NA	NA	EMIL	NA
F6S9T1	Thrombospondin 3	THBS3	0.249024729	0.71956755	0.052395722	CM
O02722	Metalloproteinase inhibitor 1 (Tissue inhibitor of metalloproteinases 1) (TIMP-1)	TIMP1	1893748393	1798669956	1051363811	1213005857
Q9TUL9	Metalloproteinase inhibitor 3 (Tissue inhibitor of metalloproteinases 3) (TIMP-3)	TIMP3	EMIL	NA	128235321	CMIL
F6PN81	Tenascin C	TNC	2904242969	2011117103	1212218579	0.452831013
F6VED1	TNF alpha induced protein 6	TNFAIP6	1161080833	5726546162	EMIL	0.866755772
F6QYH5	Uncharacterized protein	UnP	2561162282	3320917352	1033584466	NA
F6WNQ7	Vasorin	VASN	1841990107	2983079097	3101188259	1603940428
F6WUE0	Vascular cell adhesion molecule 1	VCAM1	EMIL	NA	3509643052	NA
Q9GKR0	Vascular endothelial growth factor A (VEGF-A) (Vascular permeability factor) (VPF)	VEGFA VEGF	EMIL	NA	NA	NA
F6SD86	Vascular endothelial growth factor C	VEGFC	EMIL	NA	NA	NA
F7B5C4	Vimentin	VIM	0.931180969	0.77203639	0.254804124	0.774823728
F7CRY5	WAP, follistatin/kazal, immunoglobulin, kunitz and netrin domain containing 2	WFIKKN2	0.277310883	CMIL	NA	NA
F7AZP8	Xylosyltransferase 1	XYLT1	NA	0.533292292	EMIL	1117993592
F7DZB2	Zyxin	ZYX	0.816558261	0.704521126	EM	0.955690595
